# Supplementary material
Source: Springer Nature journal article supplement (https://www.springermedizin.de/resource/supplementary/13048_2012_97_MOESM1_ESM.pdf/9664888)

A.

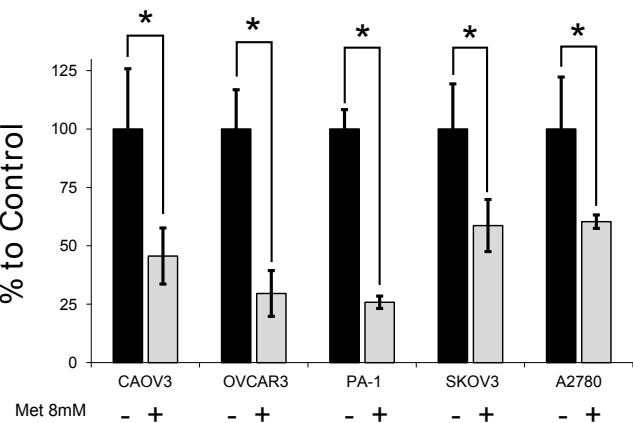

B.

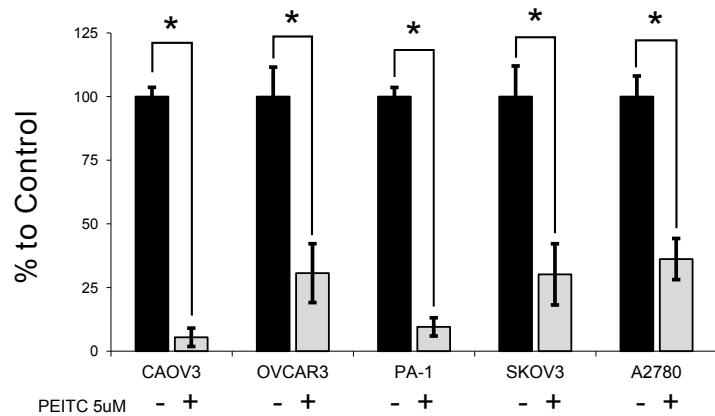

C. SKOV3

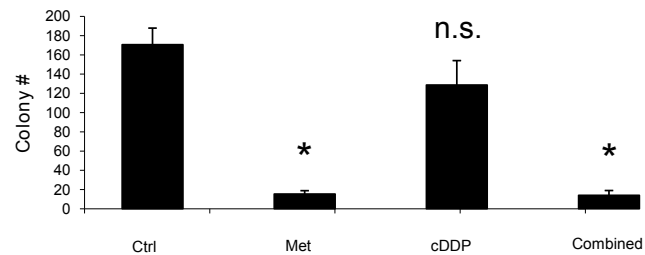

D. CAOV3

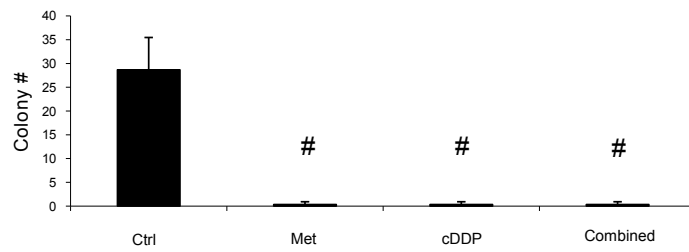

Supplement: MOESM1 [file 9664888]
